# Supplementary material for: Spectroscopy as a tool for process development and control in cultured meat production by analyzing media composition
Source: Research Square preprint supplement (doi:10.21203/rs.3.rs-6123711/v1), 2025-04-04
Supplement: Supplementary file 1 [file 214f397242d9b498233768d8.docx]

Figure S1. All raw absorbance spectra from FTIR analysis.

Figure S2. All raw absorbance spectra from Raman analysis.

Figure S3. All raw absorbance spectra from NIR analysis.

Figure S4. All raw fluorescence spectra.

Figure S5. Regression coefficients from calibration model for lactate using Raman spectroscopy.

Figure S6. Regression coefficients from calibration model for lactate using FTIR spectroscopy.

Figure S7. Regression coefficients from calibration model for lactate using Fluorescence spectroscopy for experiment 1.

Figure S8. Regression coefficients from calibration model for lactate using Fluorescence spectroscopy for experiment 2.

Figure S9. Regression coefficients from calibration model for lactate using NIR spectroscopy.

Figure S10. Regression coefficients from calibration model for glucose using Raman spectroscopy.

Figure S11. Regression coefficients from calibration model for glucose using FTIR spectroscopy.

Figure S12. Regression coefficients from calibration model for glucose using Fluorescence spectroscopy for experiment 1.

Figure S13. Regression coefficients from calibration model for glucose using Fluorescence spectroscopy for experiment 2.

Figure S14. Regression coefficients from calibration model for glucose using NIR spectroscopy.

Figure S15. Absorbance FTIR spectrum of lactate in water (approx. 2 g/L).

Figure S16. Pre-processed Raman spectrum of lactate in water (approx. 2 g/L).
